# Supplementary material
Source: PubMed Central journal article supplement (PMC3746703)
Supplement: npp201394x1.pdf [file npp201394x1.pdf]

## Supplementary material

Evidence for shared genetic risk between  
methamphetamine-induced psychosis and schizophrenia

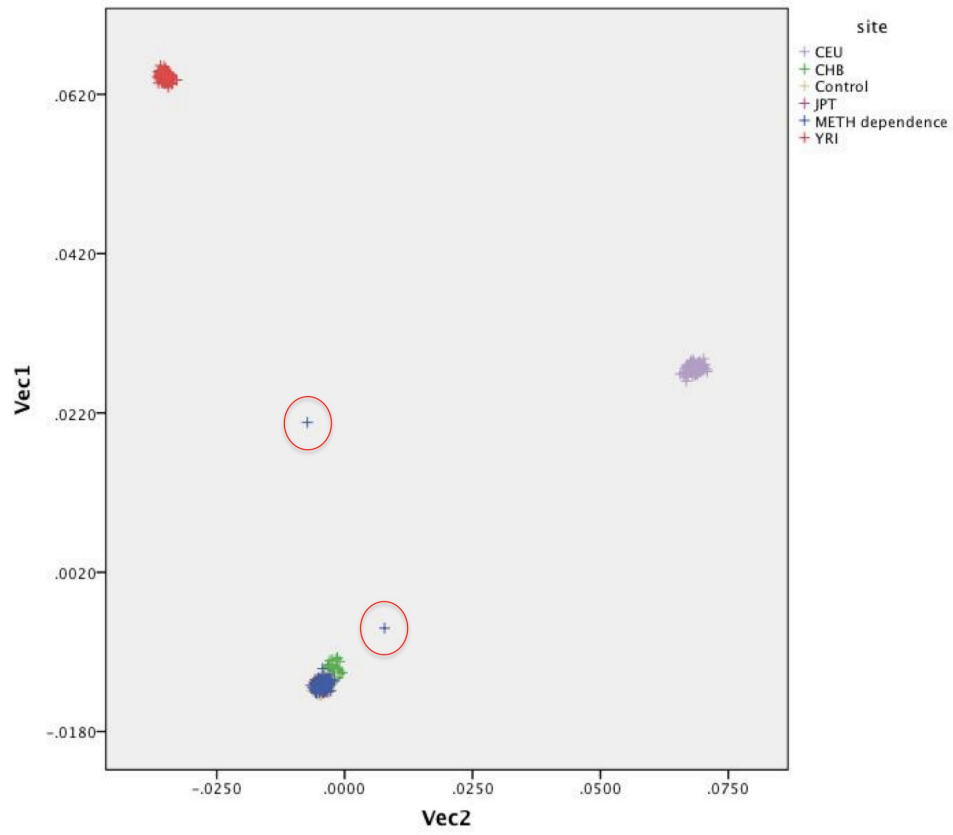

FigureS1. Principal Component analysis: Scatter plot of Eigenvectors 1&2  
Red circles represents outliers

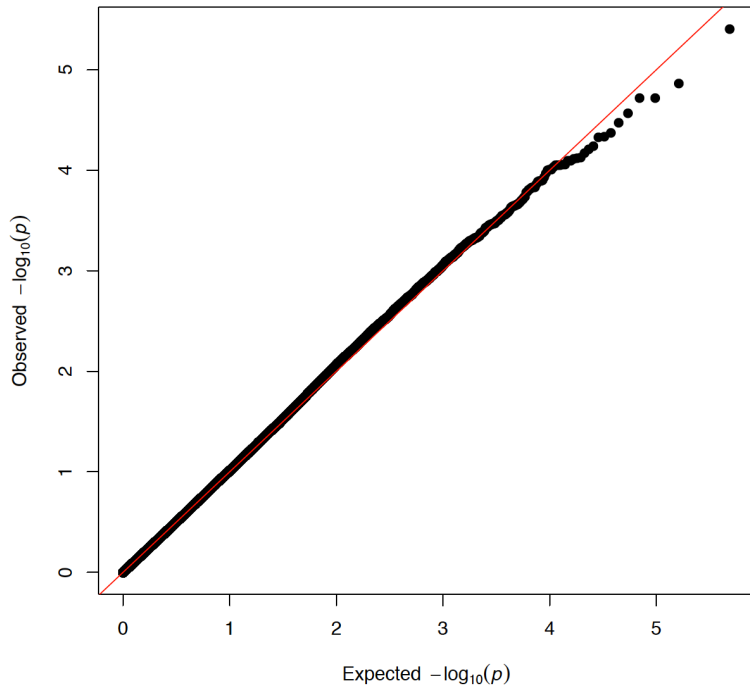

Supplementary FigureS2: QQ plot of METH-dependence GWAS ( $\lambda=1.024$ )

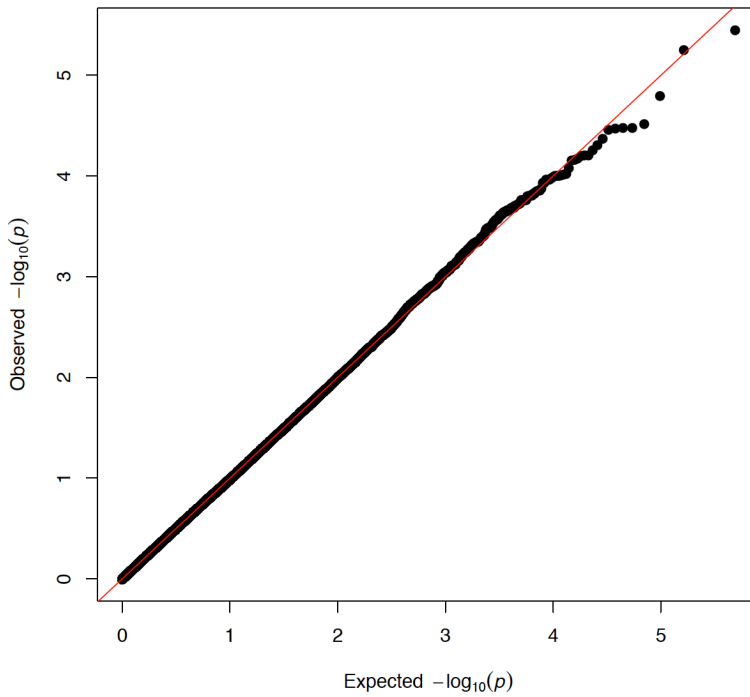

Supplementary FigureS3: QQ plot of METH-induced psychosis GWAS ( $\lambda=1.016$ )

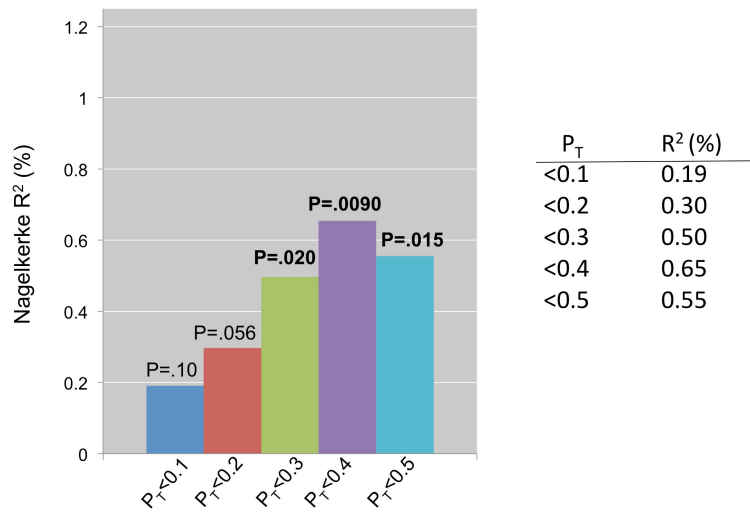

Supplementary FigureS4: Polygenic component analysis for the pairs of METH-induced psychosis/schizophrenia

Discovery: METH-induced psychosis vs METH non-psychosis

Target: Schizophrenia vs healthy controls

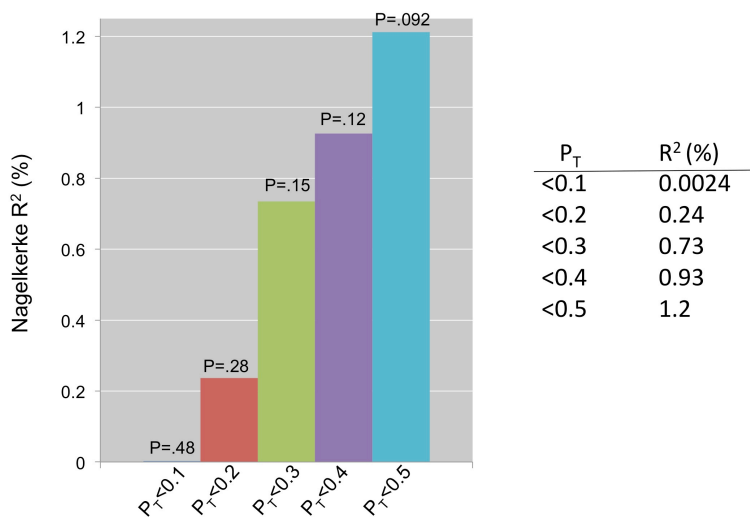

Supplementary FigureS5: Polygenic component analysis for the pairs of schizophrenia/METH-induced psychosis

Discovery: Schizophrenia vs healthy controls

Target: METH-induced psychosis vs METH non-psychosis

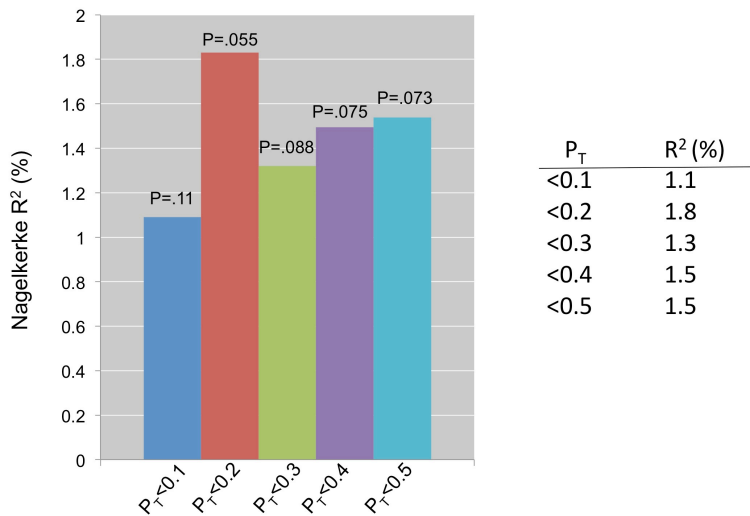

Supplementary FigureS6: Polygenic component analysis for the pairs of METH-dependence/METH-induced psychosis

Discovery: METH dependence vs healthy control

Target: METH-induced psychosis vs METH non-psychosis

(NOTE: Scale of Y axis is different from other figures)

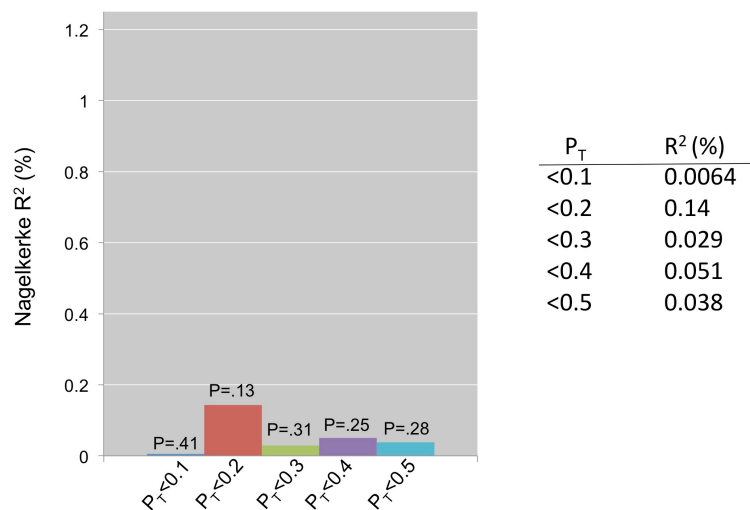

Supplementary FigureS7: Polygenic component analysis for the pairs of METH-dependence/schizophrenia

Discovery: METH dependence vs healthy control

Target: Schizophrenia vs healthy controls

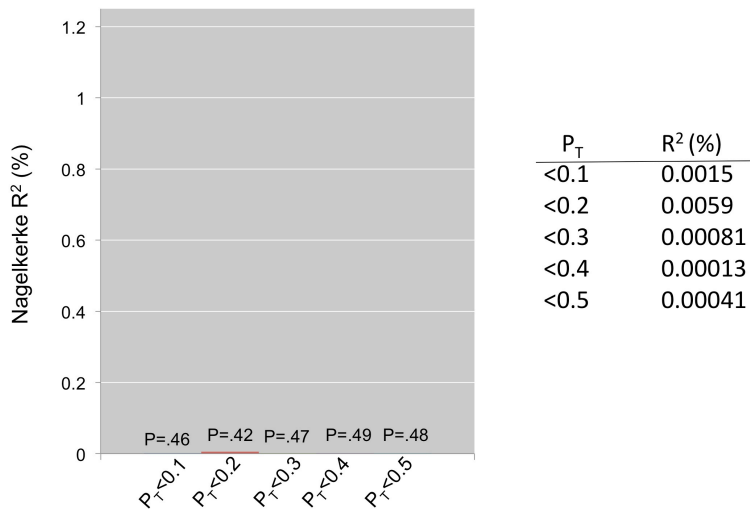

Supplementary Figure S8: Polygenic component analysis for the pairs of METH-induced psychosis/METH-dependence

Discovery: METH-induced psychosis vs METH non-psychosis

Target: METH dependence vs healthy control

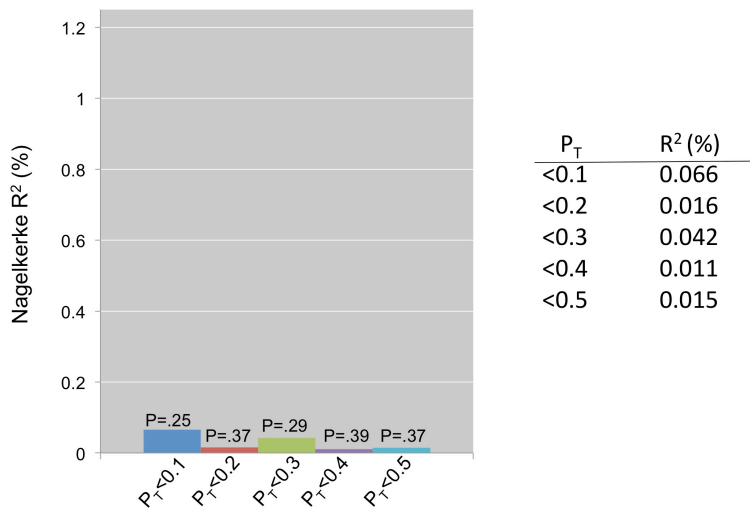

Supplementary Figure S9: Polygenic component analysis for the pairs of schizophrenia/METH-dependence

Discovery: Schizophrenia vs healthy controls

Target: METH dependence vs healthy control

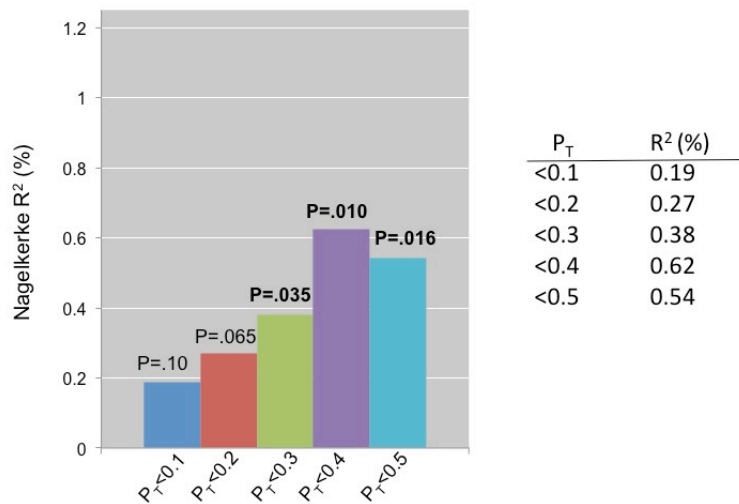

Supplementary FigureS10: Polygenic component analysis for the pairs of METH-induced psychosis/schizophrenia with adjustment of principle component (first 4 components) in the discovery statistics

Discovery: METH-induced psychosis vs METH non-psychosis

Target: Schizophrenia vs healthy controls

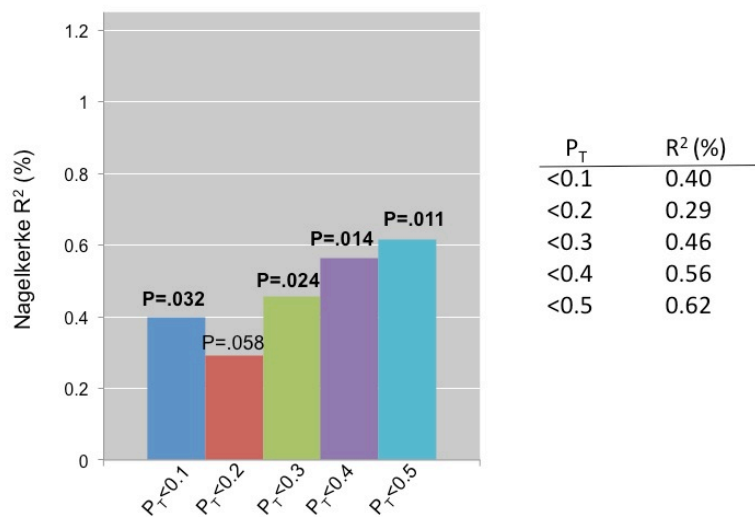

Supplementary FigureS11: Polygenic component analysis for the pairs of METH-induced psychosis/schizophrenia with covariating gender in the discovery statistics

Discovery: METH-induced psychosis vs METH non-psychosis

Target: Schizophrenia vs healthy controls

| SNP        | rank | CHR <sup>a</sup> | BP <sup>b</sup> | A1 <sup>c</sup> | F <sup>d</sup> of A1 in case | F <sup>d</sup> of A1 in control | A2 <sup>e</sup> | OR <sup>f</sup> | P <sub>gc</sub> <sup>g</sup> | Gene <sup>h</sup> | SNP type | Closest Gene <sup>i</sup> | left_gene    | right_gene   |
|------------|------|------------------|-----------------|-----------------|------------------------------|---------------------------------|-----------------|-----------------|------------------------------|-------------------|----------|---------------------------|--------------|--------------|
| rs4427170  | 1    | 8                | 14853781        | T               | 0.515                        | 0.3947                          | A               | 1.629           | 3.9E-06                      | SGCZ              | intron   |                           | MIR383       | TUSC3        |
| rs7626857  | 2    | 8                | 99436341        | A               | 0.08079                      | 0.1624                          | G               | 0.4533          | 1.4E-05                      | NA                | intron   | KCNS2                     | LOC100131849 | KCNS2        |
| rs12894058 | 3    | 14               | 33532016        | A               | 0.2222                       | 0.14                            | G               | 1.754           | 1.9E-05                      | NPAS3             | intron   |                           | AKAP6        | EGLN3        |
| rs2326193  | 4    | 8                | 120029709       | A               | 0.3376                       | 0.2386                          | C               | 1.627           | 1.9E-05                      | NA                | NA       | NA                        | LOC100286746 | COLEC10      |
| rs4915748  | 5    | 1                | 61954169        | T               | 0.1496                       | 0.2416                          | C               | 0.5521          | 2.7E-05                      | NA                | NA       | NFIA                      | MGC34796     |              |
| rs617231   | 6    | 11               | 84837898        | C               | 0.1309                       | 0.07035                         | T               | 1.99            | 3.4E-05                      | DLG2              | intron   |                           | LOC100421794 | LOC100419092 |
| rs6022102  | 7    | 20               | 51425077        | C               | 0.2094                       | 0.1325                          | A               | 1.734           | 4.2E-05                      | NA                | NA       | TRNAI30P                  | RPL36P1      |              |
| rs6940190  | 8    | 6                | 148644731       | A               | 0.2799                       | 0.3831                          | T               | 0.626           | 4.6E-05                      | NA                | NA       | SASH1                     | SAMD5        | SASH1        |
| rs2416305  | 9    | 5                | 112483604       | G               | 0.197                        | 0.2933                          | A               | 0.591           | 4.7E-05                      | MCC               | intron   |                           | DCP2         | YTHDC2       |
| rs1711695  | 10   | 5                | 150432446       | C               | 0.1859                       | 0.1145                          | T               | 1.765           | 5.7E-05                      | TNIP1             | intron   |                           | GPX3         | ANXA6        |
| rs10070761 | 11   | 5                | 148774984       | T               | 0.1731                       | 0.2639                          | C               | 0.5838          | 6.2E-05                      | NA                | intron   | IL17B                     | MIR147       |              |
| rs11225508 | 12   | 11               | 97097033        | T               | 0.1816                       | 0.1117                          | C               | 1.765           | 6.7E-05                      | NA                | NA       |                           | LOC100131233 | LOC100289416 |
| rs12202025 | 13   | 6                | 79945057        | G               | 0.1453                       | 0.08353                         | T               | 1.865           | 7.4E-05                      | LOC100288198      | NA       |                           | HMG3         | LOC100131959 |
| rs6060163  | 14   | 20               | 33611738        | T               | 0.2521                       | 0.1705                          | C               | 1.64            | 7.5E-05                      | TRPC4AP           | intron   |                           | MYH7B        | EDEM2        |
| rs6076036  | 15   | 20               | 23173497        | G               | 0.1738                       | 0.2636                          | T               | 0.5877          | 7.7E-05                      | NA                | NA       | LOC100505664              | LOC100505664 | NXT1         |
| rs12811063 | 16   | 12               | 81440720        | C               | 0.3462                       | 0.2535                          | G               | 1.559           | 8E-05                        | NA                | NA       | NA                        | LIN7A        | ACSS3        |
| rs10506839 | 17   | 12               | 81445603        | G               | 0.3462                       | 0.2535                          | A               | 1.559           | 8E-05                        | NA                | NA       | NA                        | LIN7A        | ACSS3        |
| rs6432978  | 18   | 2                | 167989231       | T               | 0.1385                       | 0.07855                         | A               | 1.886           | 8.8E-05                      | XIRP2             | intron   |                           | SCN7A        | LOC100996260 |
| rs254230   | 19   | 5                | 115885858       | T               | 0.4145                       | 0.518                           | C               | 0.6589          | 8.8E-05                      | SEMA6A            | intron   |                           | COMMD10      | RPS14P8      |
| rs11856426 | 20   | 15               | 99175000        | G               | 0.5662                       | 0.4629                          | A               | 1.515           | 8.9E-05                      | NA                | NA       | IGF1R                     | FAM169B      | IGF1R        |
| rs1695219  | 21   | 18               | 45108497        | G               | 0.3476                       | 0.2552                          | A               | 1.555           | 8.9E-05                      | NA                | NA       | NA                        | MIR4527      | TPMTP1       |
| rs6086077  | 22   | 20               | 33607464        | C               | 0.2521                       | 0.1713                          | T               | 1.631           | 8.9E-05                      | TRPC4AP           | intron   |                           | MYH7B        | BAATP1       |
| rs382004   | 23   | 21               | 20304155        | G               | 0.08547                      | 0.04051                         | A               | 2.214           | 9.3E-05                      | NA                | NA       | NA                        | PPIAP22      | SLC6A6P      |
| rs7844579  | 24   | 8                | 19748603        | C               | 0.3312                       | 0.4323                          | T               | 0.6503          | 9.8E-05                      | NA                | NA       | NA                        | INTS10       | LPL          |
| rs1098456  | 25   | 9                | 10401196        | C               | 0.2771                       | 0.376                           | T               | 0.6359          | 9.9E-05                      | LPPR1             | intron   |                           | LOC100422500 | BAATP1       |
| rs12327437 | 26   | 18               | 45117529        | C               | 0.3526                       | 0.2604                          | A               | 1.547           | 1E-04                        | NA                | NA       | NA                        | MIR4527      | TPMTP1       |
| rs10501586 | 27   | 11               | 84756077        | C               | 0.1218                       | 0.06678                         | T               | 1.938           | 0.00011                      | DLG2              | intron   |                           | LOC100421794 | LOC100419092 |
| rs7822518  | 28   | 8                | 19748856        | C               | 0.3355                       | 0.4356                          | T               | 0.6541          | 0.00012                      | NA                | NA       | NA                        | INTS10       | LPL          |
| rs6764198  | 29   | 3                | 62117185        | G               | 0.3333                       | 0.2442                          | T               | 1.547           | 0.00012                      | PTPRG             | intron   |                           | ID2B         | LOC100506994 |
| rs7677817  | 30   | 4                | 96763977        | C               | 0.1645                       | 0.1002                          | T               | 1.768           | 0.00013                      | NA                | NA       | PDHA2                     | PDHA2        | LOC100418701 |
| rs7236339  | 31   | 18               | 77579773        | A               | 0.1923                       | 0.1227                          | G               | 1.703           | 0.00013                      | NA                | NA       | NA                        | CTDP1        | KCNK2        |
| rs1816366  | 32   | 9                | 103989475       | T               | 0.3312                       | 0.4305                          | C               | 0.6552          | 0.00013                      | LPPR1             | intron   |                           | LOC100422500 | BAATP1       |
| rs2009141  | 33   | 4                | 173786533       | C               | 0.03205                      | 0.08449                         | G               | 0.3588          | 0.00014                      | GALNT6            | intron   |                           | LOC100506133 | GALNT7       |
| rs2416306  | 34   | 5                | 112483932       | A               | 0.2073                       | 0.297                           | G               | 0.6189          | 0.00015                      | MCC               | intron   |                           | DCP2         | YTHDC2       |
| rs34984260 | 35   | 7                | 114947770       | G               | 0.513                        | 0.4132                          | A               | 1.496           | 0.00015                      | NA                | NA       | NA                        | RAC1P6       | TFEC         |
| rs3825490  | 36   | 13               | 111117984       | T               | 0.221                        | 0.3124                          | C               | 0.6247          | 0.00015                      | COL4A2            | intron   |                           | COL4A1       | RAB20        |
| rs16852911 | 37   | 4                | 41205654        | T               | 0.07692                      | 0.1443                          | A               | 0.4942          | 0.00015                      | APBB2             | intron   |                           | NSUN7        | UCLH1        |
| rs17310782 | 38   | 20               | 33565665        | T               | 0.25                         | 0.1719                          | C               | 1.606           | 0.00015                      | MYH7B             | intron   |                           | GSS          | TRPC4AP      |
| rs41443246 | 39   | 4                | 137943051       | T               | 0.1073                       | 0.05699                         | C               | 1.989           | 0.00016                      | NA                | intron   |                           | TRF1P3       | SERF1AP1     |
| rs6083037  | 40   | 20               | 23182559        | T               | 0.1752                       | 0.2605                          | A               | 0.6032          | 0.00016                      | NA                | NA       | NA                        | CD93         | NXT1         |
| rs4649307  | 41   | 1                | 233513117       | T               | 0.3043                       | 0.4016                          | A               | 0.6518          | 0.00016                      | KIAA1804          | intron   |                           | PCNXL2       | KCNK1        |
| rs1155808  | 42   | 14               | 56783688        | G               | 0.4979                       | 0.4005                          | T               | 1.484           | 0.00018                      | NA                | NA       | PEL12                     | LOC100422500 | C14orf101    |
| rs17469669 | 43   | 2                | 140895729       | C               | 0.4295                       | 0.3351                          | C               | 1.494           | 0.00018                      | NA                | NA       | NA                        | RPL9P13      | MTND2P19     |
| rs1485283  | 44   | 8                | 120001663       | T               | 0.1278                       | 0.2059                          | C               | 0.5648          | 0.00019                      | NA                | NA       | LOC100286746              | LOC100286746 | COLEC10      |
| rs17054037 | 45   | 8                | 25481787        | C               | 0.2372                       | 0.162                           | G               | 1.608           | 0.0002                       | NA                | NA       | NA                        | CDCA2        | EBF2         |
| rs1327126  | 46   | 1                | 115973920       | T               | 0.4573                       | 0.3619                          | C               | 1.485           | 0.0002                       | NA                | NA       | NA                        | NGF          | TCB1P20      |
| rs11668252 | 47   | 19               | 16072153        | T               | 0.4893                       | 0.3929                          | G               | 1.48            | 0.00021                      | NA                | NA       | OR10H4                    | OR10H4       | LOC100996403 |
| rs2295701  | 48   | 20               | 33596117        | G               | 0.2511                       | 0.1741                          | C               | 1.59            | 0.00021                      | TRPC4AP           | intron   |                           | MYH7B        | EDEM2        |
| rs3734369  | 49   | 6                | 71569129        | T               | 0.4849                       | 0.3886                          | C               | 1.481           | 0.00022                      | SMAP1             | intron   |                           | LOC100419975 | B3GAT2       |
| rs4944507  | 50   | 11               | 84783389        | T               | 0.1047                       | 0.05613                         | G               | 1.966           | 0.00022                      | DLG2              | intron   |                           | LOC100421794 | LOC100419092 |
| rs228970   | 51   | 21               | 25671052        | T               | 0.3269                       | 0.4225                          | C               | 0.664           | 0.00022                      | NA                | NA       | NA                        | VN2R20P      | LOC100419737 |
| rs1598570  | 52   | 4                | 96789975        | A               | 0.1609                       | 0.0993                          | G               | 1.74            | 0.00022                      | NA                | NA       | NA                        | PDHA2        | LOC100418701 |
| rs891140   | 53   | 16               | 57055714        | C               | 0.3391                       | 0.252                           | A               | 1.523           | 0.00023                      | NLR5              | intron   |                           | LOC100130044 | CPNE2        |
| rs641655   | 54   | 11               | 84775335        | C               | 0.1379                       | 0.08121                         | T               | 1.81            | 0.00023                      | DLG2              | intron   |                           | LOC100421794 | LOC100419092 |
| rs964038   | 55   | 2                | 140950689       | T               | 0.1695                       | 0.252                           | G               | 0.6058          | 0.00023                      | NA                | NA       | NA                        | RPL9P13      | MTND2P19     |
| rs1025445  | 56   | 2                | 222169464       | G               | 0.3761                       | 0.4728                          | C               | 0.6721          | 0.00023                      | NA                | NA       | NA                        | MIR4288      | EPHA4        |
| rs902891   | 57   | 12               | 129978517       | C               | 0.3376                       | 0.2514                          | T               | 1.517           | 0.00023                      | TMEM132D          | intron   |                           | TRNAI29P     | FZD10        |
| rs16920100 | 58   | 9                | 104024328       | C               | 0.2778                       | 0.3701                          | T               | 0.6547          | 0.00025                      | LPPR1             | intron   |                           | LOC100422500 | BAATP1       |
| rs4584622  | 59   | 12               | 72672823        | C               | 0.04274                      | 0.09664                         | A               | 0.4173          | 0.00025                      | TRHDE             | intron   |                           | TRHDE-AS1    | LOC100422354 |
| rs552529   | 60   | 11               | 84761929        | T               | 0.1261                       | 0.07259                         | A               | 1.843           | 0.00026                      | DLG2              | intron   |                           | LOC100421794 | LOC100419092 |
| rs542892   | 61   | 11               | 94791038        | G               | 0.1111                       | 0.06134                         | A               | 1.913           | 0.00026                      | DLG2              | NA       | NA                        | LOC100421794 | LOC100419092 |
| rs16959320 | 62   | 17               | 93780328        | G               | 0.2382                       | 0.1641                          | T               | 1.592           | 0.00027                      | STX8              | intron   |                           |              | WDR16        |
| rs17049438 | 63   | 3                | 8710790         | G               | 0.08547                      | 0.04282                         | C               | 2.089           | 0.00027                      | NA                | NA       | C3orf32                   | C3orf32      | OR7E122P     |
| rs17067210 | 64   | 13               | 77686033        | C               | 0.1731                       | 0.11                            | T               | 1.694           | 0.00027                      | MYCBP2            | intron   |                           | FBXL3        | SEEL         |
| rs4941375  | 65   | 18               | 55944135        | C               | 0.2115                       | 0.2977                          | A               | 0.633           | 0.00027                      | NEDD4L            | intron   |                           | HMGNP130     | MIR122       |
| rs16972470 | 66   | 15               | 42312142        | T               | 0.04405                      | 0.09894                         | C               | 0.4197          | 0.00028                      | PLA2G4E           | intron   |                           | EHD4         | PLA2G4D      |
| rs7237852  | 67   | 18               | 7171101         | A               | 0.188                        | 0.2714                          | G               | 0.6217          | 0.00028                      | NA                | NA       | NA                        | SLC25A51P2   | LRR30        |
| rs2196515  | 68   | 4                | 96685664        | C               | 0.4722                       | 0.3785                          | A               | 1.469           | 0.00028                      | NA                | NA       | NA                        | RPL30P6      | PDHA2        |
| rs2643338  | 69   | 8                | 97247469        | G               | 0.3889                       | 0.2997                          | A               | 1.487           | 0.00028                      | UOCRB             | intron   |                           | GDF6         | MTERFD1      |
| rs515867   | 70   | 11               | 63214549        | T               | 0.2393                       | 0.1657                          | C               | 1.584           | 0.00029                      | NA                | NA       | HRASLS5                   | LOC222A9     | HRASLS5      |
| rs1894209  | 71   | 11               | 97108951        | G               | 0.1987                       | 0.1314                          | C               | 1.64            | 0.0003                       | NA                | NA       | NA                        | LOC100131233 | LOC100289416 |
| rs11028374 | 72   | 11               | 3618417         | T               | 0.1545                       | 0.09524                         | A               | 1.736           | 0.0003                       | NA                | NA       | OR7E117P                  | LOC100132021 | OR7E117P     |
| rs11623641 | 73   | 14               | 56750158        | G               | 0.4145                       | 0.3241                          | C               | 1.477           | 0.0003                       | PEL12             | intron   |                           | LINC00520    | C14orf101    |
| rs2136665  | 74   | 16               | 84122206        | A               | 0.1303                       | 0.07648                         | T               | 1.81            | 0.00031                      | MBTPS1            | intron   |                           | LOC38A8      | LOC648774    |
| rs10777875 | 75   | 12               | 97916146        | A               | 0.2927                       | 0.3843                          | G               | 0.6632          | 0.00031                      | RMST              | NA       |                           | MIR1251      | MIR135A2     |
| rs17155006 | 76   | 7                | 107757843       | C               | 0.5022                       | 0.4079                          | T               | 1.464           | 0.00032                      | LAMB4             | intron   |                           | LAMB1        | NRCAM        |
| rs34855831 | 77   | 4                | 62728124        | T               | 0.4274                       | 0.3364                          | C               | 1.472           | 0.00032                      | LPHN3             | intron   |                           | RPS12P9      | RPS15A17     |
| rs6022097  | 78   | 20               | 51415335        | G               | 0.2137                       | 0.1443                          | A               | 1.612           | 0.00032                      | NA                | NA       | NA                        | TRNAI30P     | RPL36P1      |
| rs7141728  | 79   | 14               | 34239296        | A               | 0.3333                       | 0.2494                          | C               | 1.505           | 0.00032                      | NPAS3             | intron   |                           | AKAP6        | EGLN3        |
| rs1152064  | 80   | 18               | 55954081        | C               | 0.2103                       | 0.2951                          | T               | 0.636           | 0.00033                      | NEDD4L            | intron   |                           | HMGNP130     | MIR122       |
| rs6088660  | 81   | 20               | 33542896        | T               | 0.2457                       | 0.1719                          | C               | 1.57            | 0.00033                      | GSS               | intron   |                           | ACSS2        | MYH7B        |
| rs9916292  | 82   | 17               | 9336858         | G               | 0.1368                       | 0.08169                         | A               | 1.781           | 0.00034                      | STX8              | intron   |                           | NTN1         | WDR16        |
| rs12040431 | 83   | 1                | 61935306        | T               | 0.3133                       | 0.4056                          | C               | 0.6686          | 0.00034                      | NA                | NA       | NFIA                      | NFIA         | MGC34796     |
| rs4741904  | 84   | 9                | 4176178         | C               | 0.2179                       | 0.3032                          | T               | 0.6403          | 0.00034                      | GLIS3             | intron   |                           | RF3          | SLC1A1       |
| rs9891309  | 85   | 17               | 18814976        | T               | 0.08547                      | 0.04333                         | C               | 2.064           | 0.00034                      | PRPSAP2           | intron   |                           | LOC100419620 | SLC5A10      |
| rs17091651 | 86   | 8                | 19749883        | T               | 0.2661                       | 0.3556                          | A               | 0.6569          | 0.00034                      | NA                | NA       | NA                        | INTS10       | LPL          |
| rs1908786  | 87   | 15               | 86866875        | A               | 0.3846                       | 0.2969                          | G               | 1.48            | 0.00034                      | AGBL1             | intron   |                           | LOC727915    | LINC00052    |
| rs7814519  | 88   | 8                | 14862125        | C               | 0.3355                       | 0.2517                          | G               | 1.501           | 0.000                        |                   |          |                           |              |              |



| SNP        | rank | CHR <sup>a</sup> | BP <sup>b</sup> | A1 <sup>c</sup> | F <sup>2</sup> of A1 in case | F <sup>2</sup> of A1 in control | A2 <sup>e</sup> | OR <sup>f</sup> | P <sub>adj</sub> <sup>g</sup> | Gene <sup>h</sup> | SNP type | Closest Gene <sup>i</sup> | left gene    | right gene   |
|------------|------|------------------|-----------------|-----------------|------------------------------|---------------------------------|-----------------|-----------------|-------------------------------|-------------------|----------|---------------------------|--------------|--------------|
| rs12591257 | 1    | 15               | 87064089        | C               | 0.04145                      | 0.1829                          | A               | 0.1932          | 3.6E-06                       | AGBL1             | intron   |                           | KLHL25       | LINC00052    |
| rs2346713  | 2    | 15               | 87078337        | C               | 0.06736                      | 0.2317                          | A               | 0.2395          | 5.6E-06                       | AGBL1             | intron   |                           | KLHL25       | LINC00052    |
| rs16977267 | 3    | 15               | 86993464        | T               | 0.07254                      | 0.2317                          | G               | 0.2593          | 1.6E-05                       | AGBL1             | intron   |                           | KLHL25       | LINC00052    |
| rs13414154 | 4    | 2                | 129012073       | A               | 0.1451                       | 0.3415                          | G               | 0.3273          | 3.1E-05                       | NA                | NA       | HS6ST1                    | UGCG1        | HS6ST1       |
| rs6767236  | 5    | 3                | 143758399       | G               | 0.1891                       | 0.4024                          | T               | 0.3463          | 3.3E-05                       | NA                | NA       |                           | C3orf58      | LOC100421509 |
| rs6091985  | 6    | 20               | 53445939        | C               | 0.04404                      | 0.1707                          | G               | 0.2238          | 3.3E-05                       | NA                | NA       | NA                        | DK05         | RPL12P4      |
| rs7333069  | 7    | 13               | 82458858        | A               | 0.3938                       | 0.6463                          | C               | 0.2554          | 3.4E-05                       | NA                | NA       | NA                        | HIGD1AP2     | GYG1P2       |
| rs8026683  | 8    | 15               | 86825255        | A               | 0.09845                      | 0.2683                          | C               | 0.2978          | 3.5E-05                       | AGBL1             | intron   |                           | KLHL25       | LINC00052    |
| rs6064117  | 9    | 20               | 53458592        | G               | 0.04663                      | 0.175                           | A               | 0.2306          | 4.2E-05                       | NA                | NA       | NA                        | DK05         | CBLN4        |
| rs2768428  | 10   | 10               | 12523129        | T               | 0.05181                      | 0.1829                          | C               | 0.2441          | 4.9E-05                       | CAMK1D            | intron   |                           | CDC123       | CCDC3        |
| rs12605879 | 11   | 18               | 67365926        | A               | 0.4237                       | 0.1829                          | G               | 3.284           | 5.5E-05                       | DK06              | intron   |                           | CDC102B      | CCD28        |
| rs6023649  | 12   | 20               | 53470583        | A               | 0.04663                      | 0.1707                          | G               | 0.2376          | 6.2E-05                       | NA                | NA       | NA                        | DK05         | CBLN4        |
| rs17314203 | 13   | 4                | 162158922       | T               | 0.2824                       | 0.5122                          | C               | 0.3748          | 6.2E-05                       | NA                | NA       | NA                        | RPS14P7      | FSTL5        |
| rs11245346 | 14   | 10               | 126425537       | C               | 0.1736                       | 0.375                           | G               | 0.3501          | 6.3E-05                       | FAM53B            | intron   |                           | LHPP         | METTL10      |
| rs7239623  | 15   | 18               | 8484922         | A               | 0.2581                       | 0.4872                          | G               | 0.3661          | 6.7E-05                       | NA                | NA       | NA                        | PTRPM        | LOC100420484 |
| rs4965381  | 16   | 15               | 101932462       | A               | 0.4508                       | 0.6951                          | G               | 0.36            | 6.8E-05                       | PCSK6             | intron   |                           | LOC100507472 | LOC100289564 |
| rs4426448  | 17   | 18               | 67365668        | A               | 0.4197                       | 0.1829                          | G               | 3.23            | 7E-05                         | DK06              | intron   |                           | CCDC102B     | CCD26        |
| rs7185087  | 18   | 16               | 6055190         | T               | 0.2073                       | 0.4146                          | C               | 0.3691          | 8.3E-05                       | NA                | NA       | RBFOX1                    | LOC100287538 | RBFOX1       |
| rs3780260  | 19   | 9                | 134522471       | A               | 0.1458                       | 0.3293                          | G               | 0.3478          | 9.4E-05                       | RAPGEF1           | intron   |                           | UCK1         | EIFA4IP3     |
| rs9668269  | 20   | 12               | 65680026        | T               | 0.1684                       | 0.3625                          | C               | 0.3561          | 9.6E-05                       | MSRB3             | intron   |                           | LEMD3        | LOC100507065 |
| rs9542732  | 21   | 13               | 72247171        | C               | 0.228                        | 0.439                           | G               | 0.3773          | 9.8E-05                       | DACH1             | intron   |                           | RABEPK1      | RPS10P21     |
| rs940281   | 22   | 8                | 11278308        | A               | 0.1295                       | 0.3049                          | T               | 0.3393          | 9.8E-05                       | NA                | NA       | NA                        | RPSAF48      | LOC100132280 |
| rs10505143 | 23   | 8                | 11280576        | C               | 0.1295                       | 0.3049                          | T               | 0.3393          | 9.8E-05                       | NA                | NA       | NA                        | RPSAF48      | LOC100132280 |
| rs17314252 | 24   | 4                | 162159122       | T               | 0.2775                       | 0.5                             | G               | 0.3841          | 9.9E-05                       | NA                | NA       | NA                        | RPS14P7      | FSTL5        |
| rs3923952  | 25   | 8                | 135398062       | A               | 0.3523                       | 0.5854                          | C               | 0.3853          | 0.0001                        | NA                | NA       | NA                        | LOC100419617 | ZFAT         |
| rs1247752  | 26   | 2                | 215928091       | C               | 0.2682                       | 0.4878                          | T               | 0.3849          | 0.00011                       | ABCA12            | intron   |                           | BAR1         | ATIC         |
| rs1879873  | 27   | 7                | 68738072        | C               | 0.09845                      | 0.2561                          | T               | 0.3172          | 0.00011                       | NA                | NA       | NA                        | MTND4P3      | AUTS2        |
| rs17107371 | 28   | 14               | 38426837        | T               | 0.09845                      | 0.2561                          | A               | 0.3172          | 0.00011                       | NA                | NA       | NA                        | LOC100652860 | SSTR1        |
| rs17107373 | 29   | 14               | 38426891        | A               | 0.09845                      | 0.2561                          | C               | 0.3172          | 0.00011                       | NA                | NA       | NA                        | LOC100652860 | SSTR1        |
| rs1898265  | 30   | 3                | 143776096       | A               | 0.2202                       | 0.4268                          | G               | 0.3792          | 0.00012                       | NA                | NA       | NA                        | C3orf58      | LOC100421509 |
| rs4673939  | 31   | 2                | 215936259       | A               | 0.2694                       | 0.4878                          | G               | 0.3872          | 0.00012                       | ABCA12            | intron   |                           | BAR1         | ATIC         |
| rs17314364 | 32   | 4                | 162159479       | A               | 0.2812                       | 0.5                             | G               | 0.3913          | 0.00013                       | NA                | NA       | NA                        | RPS14P7      | FSTL5        |
| rs12683131 | 33   | 9                | 134538406       | A               | 0.1451                       | 0.325                           | G               | 0.3524          | 0.00014                       | RAPGEF1           | intron   |                           | UCK1         | EIFA4IP3     |
| rs17117757 | 34   | 14               | 83438398        | T               | 0.1687                       | 0.3537                          | C               | 0.3655          | 0.00014                       | NA                | NA       | NA                        | ENSAF2       | RNU7-51P     |
| rs10800476 | 35   | 1                | 169751853       | T               | 0.07772                      | 0.2195                          | C               | 0.2996          | 0.00014                       | NA                | NA       | METTL18                   | LELE         | METTL18      |
| rs7073663  | 36   | 10               | 126358094       | A               | 0.1943                       | 0.3902                          | G               | 0.3768          | 0.00014                       | FAM53B            | intron   |                           | LHPP         | METTL10      |
| rs11138359 | 37   | 9                | 82415788        | C               | 0.4145                       | 0.6463                          | T               | 0.3874          | 0.00015                       | NA                | NA       | NA                        | TLF4         | LOC100533675 |
| rs16977283 | 38   | 15               | 86996860        | C               | 0.2682                       | 0.4872                          | T               | 0.3858          | 0.00015                       | AGBL1             | intron   |                           | KLHL25       | LINC00052    |
| rs1715667  | 39   | 14               | 45333584        | C               | 0.1088                       | 0.2683                          | T               | 0.333           | 0.00016                       | DOCK11P1          | NA       | NA                        | FCB3         | LOC401770    |
| rs8011828  | 40   | 14               | 45337702        | G               | 0.1088                       | 0.2683                          | A               | 0.333           | 0.00016                       | NA                | NA       | DOCK11P1                  | DOCK11P1     | LOC401770    |
| rs17115674 | 41   | 14               | 45339434        | C               | 0.1088                       | 0.2683                          | T               | 0.333           | 0.00016                       | NA                | NA       | DOCK11P1                  | DOCK11P1     | LOC401770    |
| rs10064443 | 42   | 5                | 180136233       | C               | 0.101                        | 0.2561                          | T               | 0.3265          | 0.00016                       | NA                | NA       | OR2A1P1                   | OR2A1P1      | OR2V1        |
| rs17107396 | 43   | 14               | 38441430        | C               | 0.101                        | 0.2561                          | T               | 0.3265          | 0.00016                       | NA                | NA       | NA                        | LOC100652860 | SSTR1        |
| rs747808   | 44   | 1                | 216157829       | G               | 0.03896                      | 0.1463                          | A               | 0.2358          | 0.00017                       | USH2A             | intron   |                           | KCTD3        | RMP18BP1     |
| rs107741   | 45   | 9                | 79240450        | C               | 0.03896                      | 0.1463                          | A               | 0.2358          | 0.00017                       | PRUNE2            | intron   |                           | LOC392352    | LOC10421411  |
| rs11034368 | 46   | 11               | 4880892         | C               | 0.03896                      | 0.1463                          | T               | 0.2358          | 0.00017                       | NA                | NA       | OR51H1P                   | OR51S1       | OR51H1P      |
| rs17250577 | 47   | 11               | 4883396         | G               | 0.03896                      | 0.1463                          | C               | 0.2358          | 0.00017                       | NA                | NA       | OR51H1P                   | OR51H2P      | OR51H2P      |
| rs12923113 | 48   | 16               | 49614518        | G               | 0.3161                       | 0.5366                          | A               | 0.3991          | 0.00017                       | ZNF423            | intron   |                           | ADAM3B       | MRPS21P7     |
| rs12445189 | 49   | 16               | 49615387        | C               | 0.3161                       | 0.5366                          | T               | 0.3991          | 0.00017                       | ZNF423            | intron   |                           | ADAM3B       | MRPS21P7     |
| rs12439060 | 50   | 15               | 87054030        | G               | 0.2448                       | 0.4512                          | A               | 0.3942          | 0.00018                       | AGBL1             | intron   |                           | KLHL25       | LINC00052    |
| rs2988677  | 51   | 6                | 86962565        | G               | 0.06736                      | 0.2                             | A               | 0.2889          | 0.00019                       | NA                | NA       | NA                        | LOC100289579 | LOC100652960 |
| rs17472290 | 52   | 7                | 33131424        | A               | 0.3717                       | 0.5976                          | G               | 0.3985          | 0.00019                       | NA                | NA       | RP9                       | NTSC3        | RP9          |
| rs4917818  | 53   | 10               | 100092168       | G               | 0.2552                       | 0.4634                          | A               | 0.3968          | 0.00019                       | NA                | NA       | NA                        | LTXL4        | PYROXD2      |
| rs4527375  | 54   | 3                | 143735515       | T               | 0.2161                       | 0.4146                          | A               | 0.3893          | 0.00019                       | NA                | NA       | NA                        | C3orf58      | LOC100421509 |
| rs17032625 | 55   | 3                | 35077009        | T               | 0.2358                       | 0.439                           | C               | 0.3942          | 0.0002                        | NA                | NA       | NA                        | FCFHP        | KRT78P18     |
| rs13154022 | 56   | 5                | 57415978        | A               | 0.1295                       | 0.2927                          | C               | 0.3514          | 0.0002                        | NA                | NA       | NA                        | LOC100996845 | RPSAF48      |
| rs4785326  | 57   | 16               | 49615587        | C               | 0.329                        | 0.5488                          | T               | 0.4032          | 0.0002                        | ZNF423            | intron   |                           | ADAM3B       | MRPS21P7     |
| rs12686345 | 58   | 9                | 134538386       | T               | 0.1484                       | 0.325                           | A               | 0.362           | 0.0002                        | RAPGEF1           | intron   |                           | UCK1         | EIFA4IP3     |
| rs12443065 | 59   | 15               | 87053051        | T               | 0.2461                       | 0.4512                          | C               | 0.397           | 0.0002                        | AGBL1             | intron   |                           | KLHL25       | LINC00052    |
| rs4493016  | 60   | 15               | 87050994        | T               | 0.2461                       | 0.4512                          | C               | 0.397           | 0.0002                        | AGBL1             | intron   |                           | KLHL25       | LINC00052    |
| rs41356944 | 61   | 18               | 38468593        | T               | 0.1192                       | 0.2805                          | C               | 0.3471          | 0.00021                       | NA                | NA       | NA                        | LOC100652860 | SSTR1        |
| rs482648   | 62   | 14               | 34256668        | A               | 0.4688                       | 0.2439                          | G               | 2.735           | 0.00022                       | FHOD3             | intron   |                           | LOC791126    | TPG52        |
| rs4616638  | 63   | 3                | 143735423       | A               | 0.2176                       | 0.4146                          | T               | 0.3927          | 0.00022                       | NA                | NA       | NA                        | C3orf58      | LOC100421509 |
| rs7611326  | 64   | 3                | 143736374       | A               | 0.2176                       | 0.4146                          | G               | 0.3927          | 0.00022                       | NA                | NA       | NA                        | C3orf58      | LOC100421509 |
| rs1025934  | 65   | 3                | 143756187       | G               | 0.2176                       | 0.4146                          | C               | 0.3927          | 0.00022                       | NA                | NA       | NA                        | C3orf58      | LOC100421509 |
| rs9365334  | 66   | 6                | 162302398       | G               | 0.2176                       | 0.4146                          | C               | 0.3927          | 0.00022                       | PARK2             | intron   |                           | AGAP7        | KRT78P4      |
| rs10968301 | 67   | 9                | 2804396         | C               | 0.0544                       | 0.175                           | T               | 0.2712          | 0.00022                       | LINGO2            | intron   |                           | CTAGE12P     | LOC100421194 |
| rs1564935  | 68   | 2                | 134847518       | T               | 0.1036                       | 0.2561                          | C               | 0.3358          | 0.00022                       | NA                | NA       | NA                        | NCKAP5       | MIR3679      |
| rs11836915 | 69   | 12               | 46912752        | A               | 0.09585                      | 0.2439                          | G               | 0.3287          | 0.00023                       | LOC100288798      | intron   |                           | SLC38A2      | OR7A19P      |
| rs10956757 | 70   | 8                | 135385238       | G               | 0.3523                       | 0.5732                          | T               | 0.4051          | 0.00023                       | NA                | NA       | NA                        | LOC100419617 | ZFAT         |
| rs7836091  | 71   | 8                | 135388625       | G               | 0.3523                       | 0.5732                          | T               | 0.4051          | 0.00023                       | NA                | NA       | NA                        | LOC100129104 | ZFAT         |
| rs459684   | 72   | 21               | 17100275        | T               | 0.1702                       | 0.3122                          | C               | 16.61           | 0.00023                       | NA                | NA       | USP25                     | RAD23BLP     | USP25        |
| rs41341253 | 73   | 13               | 108019412       | T               | 0.3756                       | 0.6                             | A               | 0.4011          | 0.00024                       | FAM155A           | intron   |                           | PPIAP24      | LIG4         |
| rs10245553 | 74   | 7                | 33133742        | C               | 0.3756                       | 0.5976                          | T               | 0.4052          | 0.00024                       | NA                | NA       | RP9                       | NTSC3        | RP9          |
| rs7112865  | 75   | 11               | 45326538        | G               | 0.1632                       | 0.3415                          | A               | 0.3762          | 0.00024                       | NA                | NA       | SYT13                     | SYT13        | FLJ41423     |
| rs4887475  | 76   | 15               | 87053559        | A               | 0.2383                       | 0.439                           | T               | 0.3998          | 0.00024                       | AGBL1             | intron   |                           | KLHL25       | LINC00052    |
| rs289572   | 77   | 8                | 13255926        | C               | 0.1813                       | 0.3659                          | G               | 0.384           | 0.00024                       | DLC1              | intron   |                           | KIAA1456     | C8orf48      |
| rs4708688  | 78   | 6                | 168895919       | C               | 0.4585                       | 0.6829                          | A               | 0.3932          | 0.00026                       | NA                | NA       | NA                        | FRMD1        | CTAGE13P     |
| rs11000445 | 79   | 10               | 74672399        | C               | 0.2098                       | 0.4024                          | T               | 0.3943          | 0.00026                       | OIT3              | intron   |                           | MCU          | LOC100422312 |
| rs2288975  | 80   | 7                | 132114617       | G               | 0.2005                       | 0.3902                          | A               | 0.3919          | 0.00026                       | PLXNA4            | intron   |                           | LOC100533635 | LOC100506937 |
| rs11000413 | 81   | 10               | 74541864        | G               | 0.1295                       | 0.2927                          | A               | 0.3596          | 0.00027                       | MCU               | intron   |                           | MCU          | OIT3         |
| rs9932030  | 82   | 16               | 74089082        | G               | 0.2435                       | 0.06098                         | A               | 4.958           | 0.00027                       | NA                | NA       | NA                        | RPSAF56      | LOC100996503 |
| rs3097778  | 83   | 5                | 150938507       | A               | 0.1554                       | 0.3293                          | G               | 0.3749          | 0.00027                       | FAT2              | intron   |                           | SLC36A1      | SPARC        |
| rs2072134  | 84   | 12               | 113409176       | A               | 0.1554                       | 0.3293                          | G               | 0.3749          | 0.00027                       | OAS3              | intron   |                           | OAS1         | OAS2         |
| rs4613453  | 85   | 3                | 143735600       | G               | 0.2202                       | 0.4146                          | C               | 0.3987          | 0.00027                       | NA                | NA       | NA                        | C3orf58      | LOC100421509 |
| rs1489123  | 86   | 7                | 118941365       | C               | 0.1036                       | 0.2564                          | T               | 0.3353          | 0.00028                       | NA                | NA       | NA                        | LOC648442    | KND2         |
| rs9599058  | 87   | 13               | 66612121        | C               | 0.5026                       | 0.2805                          | A               | 2.592           | 0.00028                       | NA                | NA       | NA                        | MIR548X2     | MIR4704      |
| rs11771864 | 88   | 7                | 33138875        |                 |                              |                                 |                 |                 |                               |                   |          |                           |              |              |

TableS3 Genes overlapping among METH-dependence, METH-induced psychosis and schizophrenia (SCZ)

1)

|              |        | METH-dependence |        |        |
|--------------|--------|-----------------|--------|--------|
|              |        | P<0.05          | P≥0.05 | total  |
| METH-induced | P<0.05 | 55              | 804    | 859    |
| Psychosis    | P≥0.05 | 866             | 15,324 | 16,190 |
| total        |        | 921             | 16,128 | 17,049 |

(Hypergeometric  $P_{\text{gene}}=0.11$ )

2)

|              |        | SCZ    |        |        |
|--------------|--------|--------|--------|--------|
|              |        | P<0.05 | P≥0.05 | total  |
| METH-induced | P<0.05 | 67     | 792    | 859    |
| Psychosis    | P≥0.05 | 919    | 15,271 | 16,190 |
| total        |        | 986    | 16,063 | 17,049 |

(Hypergeometric  $P_{\text{gene}}=0.0075$ )

3)

|       |        | METH-dependence |        |        |
|-------|--------|-----------------|--------|--------|
|       |        | P<0.05          | P≥0.05 | total  |
| SCZ   | P<0.05 | 58              | 928    | 986    |
|       | P≥0.05 | 863             | 15,200 | 16,063 |
| total |        | 921             | 16,128 | 17,049 |

(Hypergeometric  $P_{\text{gene}}=0.27$ )

Gene-based analysis between

- 1) METH-dependence and METH-induced psychosis
- 2) METH-induced psychosis and SCZ
- 3) METH-dependence and SCZ

| Chr | Gene      | METH-induced Psychosis |         |            |            | Schizophrenia |          |            |            |
|-----|-----------|------------------------|---------|------------|------------|---------------|----------|------------|------------|
|     |           | N of SNPs              | P value | Best SNP   | SNP Pvalue | N of SNPs     | P value  | Best SNP   | SNP Pvalue |
| 1   | C1orf156  | 11                     | 0.00462 | rs10800476 | 0.0001401  | 17            | 0.04248  | rs12135656 | 0.0069     |
| 1   | KIF26B    | 63                     | 0.0461  | rs2941280  | 0.004024   | 78            | 0.02109  | rs6677662  | 0.003868   |
| 1   | SAMD13    | 24                     | 0.02728 | rs172735   | 0.02473    | 29            | 0.0129   | rs7528615  | 0.003198   |
| 2   | ABCB6     | 6                      | 0.03782 | rs3731885  | 0.02143    | 7             | 0.00747  | rs2385394  | 0.008777   |
| 2   | ANKZF1    | 7                      | 0.04723 | rs3731885  | 0.02143    | 8             | 0.00876  | rs2891733  | 0.003445   |
| 2   | ATG9A     | 8                      | 0.04496 | rs3731885  | 0.02143    | 9             | 0.0058   | rs2891733  | 0.003445   |
| 2   | DNAJB2    | 4                      | 0.03845 | rs6723299  | 0.02425    | 6             | 0.03967  | rs2891733  | 0.003445   |
| 2   | GLB1L     | 7                      | 0.0477  | rs3731885  | 0.02143    | 8             | 0.01786  | rs2891733  | 0.003445   |
| 2   | PTPRN     | 5                      | 0.04865 | rs6723299  | 0.02425    | 9             | 0.03875  | rs2891733  | 0.003445   |
| 2   | STK16     | 7                      | 0.04793 | rs3731885  | 0.02143    | 8             | 0.0182   | rs2891733  | 0.003445   |
| 2   | TUBA4A    | 7                      | 0.0479  | rs3731885  | 0.02143    | 8             | 0.01842  | rs2891733  | 0.003445   |
| 3   | ARMET     | 5                      | 0.00276 | rs7633708  | 0.001194   | 8             | 0.01624  | rs17712228 | 0.003692   |
| 3   | C3orf18   | 5                      | 0.01051 | rs762889   | 0.004041   | 7             | 0.00629  | rs12487817 | 0.003087   |
| 3   | CISH      | 12                     | 0.006   | rs813243   | 0.002789   | 13            | 0.00758  | rs616689   | 0.003018   |
| 3   | DOCK3     | 41                     | 0.00574 | rs7633708  | 0.001194   | 60            | 0.01791  | rs4346580  | 0.002578   |
| 3   | GRM2      | 1                      | 0.03126 | rs4687773  | 0.03164    | 2             | 0.003627 | rs4687773  | 0.003902   |
| 3   | HEMK1     | 9                      | 0.00545 | rs813243   | 0.002789   | 10            | 0.00651  | rs616689   | 0.003018   |
| 3   | MAPKAPK3  | 14                     | 0.00465 | rs7615703  | 0.00264    | 15            | 0.01033  | rs616689   | 0.003018   |
| 3   | OSTalpha  | 4                      | 0.04985 | rs4916519  | 0.0259     | 5             | 0.00386  | rs2342309  | 0.001115   |
| 3   | PCYT1A    | 4                      | 0.0471  | rs4916519  | 0.0259     | 5             | 0.00481  | rs2342309  | 0.001115   |
| 3   | RAD54L2   | 3                      | 0.00311 | rs4494918  | 0.001146   | 6             | 0.01934  | rs4687592  | 0.008201   |
| 3   | RBM15B    | 5                      | 0.0025  | rs7633708  | 0.001194   | 7             | 0.02162  | rs17712228 | 0.003692   |
| 3   | TEX264    | 3                      | 0.00342 | rs4494918  | 0.001146   | 5             | 0.0109   | rs4687773  | 0.003902   |
| 3   | VPRBP     | 4                      | 0.00722 | rs17661242 | 0.00578    | 6             | 0.01031  | rs17712228 | 0.003692   |
| 4   | DKK2      | 22                     | 0.03072 | rs405252   | 0.001657   | 23            | 0.01295  | rs10489127 | 0.007531   |
| 4   | HSPA4L    | 5                      | 0.03014 | rs1824331  | 0.01623    | 7             | 0.0363   | rs1380156  | 0.005484   |
| 4   | RAP1GDS1  | 4                      | 0.03791 | rs12650841 | 0.008755   | 4             | 0.001114 | rs3775537  | 0.000791   |
| 5   | ANXA6     | 27                     | 0.00741 | rs7724316  | 0.0009782  | 38            | 0.01576  | rs7707871  | 0.002366   |
| 5   | CSF1R     | 24                     | 0.02591 | rs4705408  | 0.01619    | 26            | 0.02065  | rs1433010  | 0.005289   |
| 5   | ERBB2IP   | 23                     | 0.0248  | rs251300   | 0.007621   | 28            | 0.01442  | rs251614   | 0.0004325  |
| 5   | FAM114A2  | 24                     | 0.04393 | rs4958354  | 0.01887    | 27            | 0.02408  | rs7709154  | 0.005123   |
| 5   | MFAP3     | 14                     | 0.03698 | rs4958354  | 0.01887    | 17            | 0.01779  | rs2882468  | 0.004059   |
| 5   | SFRS12    | 6                      | 0.01898 | rs27077    | 0.01195    | 7             | 0.02685  | rs27085    | 0.005252   |
| 5   | TNIP1     | 26                     | 0.01086 | rs7724316  | 0.0009782  | 30            | 0.01618  | rs7707871  | 0.002366   |
| 6   | FKBP1     | 3                      | 0.02584 | rs17421624 | 0.006961   | 4             | 0.01037  | rs17421624 | 0.008884   |
| 6   | NOTCH4    | 17                     | 0.03128 | rs3130311  | 0.003584   | 24            | 0.01787  | rs2071286  | 0.0004878  |
| 7   | GALNTL5   | 11                     | 0.03254 | rs4726118  | 0.002041   | 11            | 0.00606  | rs4298423  | 0.00391    |
| 8   | CHCHD7    | 1                      | 0.04935 | rs7830138  | 0.05044    | 1             | 0.02899  | rs7830138  | 0.02754    |
| 8   | PLAG1     | 1                      | 0.04973 | rs7830138  | 0.05044    | 1             | 0.02693  | rs7830138  | 0.02754    |
| 10  | ANXA8-2   | 1                      | 0.04546 | rs4342964  | 0.04549    | 1             | 0.03654  | rs4342964  | 0.03651    |
| 10  | ANXA8L1-2 | 1                      | 0.04685 | rs4342964  | 0.04549    | 1             | 0.03731  | rs4342964  | 0.03651    |
| 10  | SYNPO2L   | 3                      | 0.04906 | rs10824026 | 0.0404     | 4             | 0.04709  | rs1004059  | 0.04153    |
| 13  | DLEU7     | 22                     | 0.03088 | rs2796843  | 0.007729   | 27            | 0.00124  | rs7320457  | 0.0002884  |
| 13  | RFXAP     | 11                     | 0.04384 | rs4943419  | 0.02264    | 15            | 0.02304  | rs6563500  | 0.02494    |
| 14  | TNFAIP2   | 13                     | 0.0222  | rs944007   | 0.002186   | 17            | 0.04048  | rs8008371  | 0.008582   |
| 15  | AGBL1     | 169                    | 3.9E-05 | rs12591257 | 3.57E-06   | 201           | 0.02772  | rs4393536  | 0.0005199  |
| 15  | FURIN     | 3                      | 0.0309  | rs8041787  | 0.04697    | 3             | 0.03806  | rs7171099  | 0.003971   |
| 16  | DHODH     | 5                      | 0.01224 | rs7204798  | 0.009094   | 8             | 0.03758  | rs7205297  | 0.01713    |
| 16  | GNPTG     | 1                      | 0.04633 | rs3759937  | 0.04669    | 1             | 0.01498  | rs3759937  | 0.01469    |
| 16  | NDUFB10   | 4                      | 0.02183 | rs1742402  | 0.01629    | 5             | 0.00603  | rs17602    | 0.0007807  |
| 16  | RNF151    | 4                      | 0.02271 | rs1742402  | 0.01629    | 6             | 0.0059   | rs17602    | 0.0007807  |
| 16  | RPS2      | 4                      | 0.02238 | rs1742402  | 0.01629    | 6             | 0.00615  | rs17602    | 0.0007807  |
| 16  | TBL3      | 3                      | 0.01287 | rs1742402  | 0.01629    | 5             | 0.00394  | rs17602    | 0.0007807  |
| 16  | UNKL-1    | 1                      | 0.04629 | rs3759937  | 0.04669    | 1             | 0.01491  | rs3759937  | 0.01469    |
| 17  | ABCA9     | 9                      | 0.04642 | rs11077858 | 0.02678    | 13            | 0.03241  | rs7215642  | 0.01887    |
| 17  | CYB5D2    | 9                      | 0.02413 | rs7219437  | 0.00947    | 10            | 0.03717  | rs1377806  | 0.005633   |
| 17  | CYGB      | 9                      | 0.01356 | rs3809700  | 0.01202    | 12            | 0.04553  | rs752049   | 0.02379    |
| 17  | RHBDF2    | 5                      | 0.03903 | rs752049   | 0.02727    | 7             | 0.04113  | rs752049   | 0.02379    |
| 17  | ZZEF1     | 16                     | 0.03514 | rs7219437  | 0.00947    | 18            | 0.01557  | rs781850   | 0.003054   |
| 19  | TLE6      | 2                      | 0.0258  | rs4806893  | 0.05288    | 4             | 0.03351  | rs390258   | 0.0269     |
| 19  | ZNF536    | 29                     | 0.00577 | rs10402889 | 0.009126   | 37            | 0.02308  | rs16964244 | 0.002864   |
| 21  | KCNJ6     | 68                     | 0.03621 | rs858009   | 0.0004127  | 83            | 0.00964  | rs858009   | 0.002051   |
| 22  | KREMEN1   | 29                     | 0.00226 | rs16987014 | 0.0005741  | 35            | 0.03639  | rs5762996  | 0.004994   |
| 22  | LZTR1     | 4                      | 0.04258 | rs2541953  | 0.002118   | 7             | 0.04729  | rs2239961  | 0.009702   |
| 22  | PATZ1     | 5                      | 0.03675 | rs2073860  | 0.02441    | 10            | 0.00262  | rs5753559  | 0.0007666  |
| 22  | PIK3IP1   | 7                      | 0.03867 | rs2073860  | 0.02441    | 15            | 0.00277  | rs5753559  | 0.0007666  |
| 22  | THAP7     | 4                      | 0.04333 | rs2541953  | 0.002118   | 7             | 0.04774  | rs2239961  | 0.009702   |

Table S4: Overlap genes between METH-induced psychosis and SCZ based upon gene-based analysis

## Members of JGIDA

Hiroshi Ujike (Department of Neuropsychiatry, Okayama University Graduate School of Medicine, Dentistry and Pharmaceutical Sciences), Ichiro Sora (Department of Biological Psychiatry, Tohoku University Graduate School of Medicine), Masaomi Iyo (Department of Psychiatry, Chiba University Graduate School of Medicine), Mujun Won (Kojin Hospital), Naoki Kondo (Seimei Hospital), Nobuya Naruse (Saitama Prefectural Psychiatric Hospital), Kumi Aoyama-Uehara (Serigaya Hospital), Norio Ozaki (Department of Psychiatry, Nagoya University Graduate School of Medicine) and Nakao Iwata (Department of Psychiatry, Fujita Health University School of Medicine)
